# Supplementary material
Source: publisher figshare collection journal article supplement (https://plos.figshare.com/articles/dataset/_/736914)
Supplement: Supplementary file [file 1]

restart;  
 #Digits:=40;  
 with(LinearAlgebra) :

## Text S1

This document evaluates the derived potential dV/dAx

### ▼ Ideal integrals

$$\begin{aligned} SSSS &:= (Rx, Ry, Rz, Tx, Ty, Tz) \rightarrow \frac{1}{\text{sqrt}((Rx - Tx)^2 + (Ry - Ty)^2 + (Rz - Tz)^2)}; \\ (Rx, Ry, Rz, Tx, Ty, Tz) &\rightarrow \frac{1}{\sqrt{(Rx - Tx)^2 + (Ry - Ty)^2 + (Rz - Tz)^2}} \end{aligned} \quad (1.1)$$

$$\begin{aligned} SSPOPO &:= (Rx, Ry, Rz, Tx, Ty, Tz, D2) \rightarrow SSSS(Rx, Ry, Rz, Tx, Ty, Tz) \\ &+ \frac{1}{2} \left( \frac{1}{\text{sqrt}((Rx - Tx)^2 + (Ry - Ty)^2 + (Rz - Tz)^2 + (2 \cdot D2)^2)} - SSSS(Rx, Ry, Rz, Tx, Ty, \right. \\ &\left. Tz) \right); \\ (Rx, Ry, Rz, Tx, Ty, Tz, D2) &\rightarrow \frac{1}{2} SSSS(Rx, Ry, Rz, Tx, Ty, Tz) \end{aligned} \quad (1.2)$$

$$\begin{aligned} &+ \frac{1}{2 \sqrt{(Rx - Tx)^2 + (Ry - Ty)^2 + (Rz - Tz)^2 + 4 D2^2}} \\ SSPZPZ &:= (Rx, Ry, Rz, Tx, Ty, Tz, D2) \rightarrow SSSS(Rx, Ry, Rz, Tx, Ty, Tz) \\ &+ \frac{1}{4} \left( \frac{1}{\text{sqrt}((Rx - Tx)^2 + (Ry - Ty)^2 + (Rz - Tz)^2) + 2 D2} \right. \\ &+ \left. \frac{1}{\text{sqrt}((Rx - Tx)^2 + (Ry - Ty)^2 + (Rz - Tz)^2) - 2 D2} \right) - \frac{1}{2} \cdot SSSS(Rx, Ry, Rz, Tx, Ty, Tz); \\ (Rx, Ry, Rz, Tx, Ty, Tz, D2) &\rightarrow \frac{1}{2} SSSS(Rx, Ry, Rz, Tx, Ty, Tz) \end{aligned} \quad (1.3)$$

$$\begin{aligned} &+ \frac{1}{4 \left( \sqrt{(Rx - Tx)^2 + (Ry - Ty)^2 + (Rz - Tz)^2} + 2 D2 \right)} \\ &+ \frac{1}{4 \left( \sqrt{(Rx - Tx)^2 + (Ry - Ty)^2 + (Rz - Tz)^2} - 2 D2 \right)} \\ SSSPZ &:= (Rx, Ry, Rz, Tx, Ty, Tz, D1) \rightarrow \frac{1}{2} \\ &\cdot \left( \frac{1}{\text{sqrt}((Rx - Tx)^2 + (Ry - Ty)^2 + (Rz - Tz)^2) + D1} \right. \\ &- \left. \frac{1}{\text{sqrt}((Rx - Tx)^2 + (Ry - Ty)^2 + (Rz - Tz)^2) - D1} \right); \\ (Rx, Ry, Rz, Tx, Ty, Tz, D1) &\rightarrow \frac{1}{2 \left( \sqrt{(Rx - Tx)^2 + (Ry - Ty)^2 + (Rz - Tz)^2} + D1 \right)} \end{aligned} \quad (1.4)$$

$$- \frac{1}{2 \left( \sqrt{(Rx - Tx)^2 + (Ry - Ty)^2 + (Rz - Tz)^2} - DI \right)}$$

## Projection operators

$$X_1 := (Rx, Ry, Rz, Tx, Ty, Tz) \rightarrow \frac{Rx - Tx}{\text{sqrt}((Rx - Tx)^2 + (Ry - Ty)^2 + (Rz - Tz)^2)} :$$

$$X_1(Rx, Ry, Rz, Tx, Ty, Tz) :$$

$$\text{subs}(Rx^2 - 2 Rx Tx + Tx^2 + Ry^2 - 2 Ry Ty + Ty^2 + Rz^2 - 2 Rz Tz + Tz^2 = R2, \%) : \\ \text{factor}(\%);$$

$$\frac{Rx - Tx}{\sqrt{R2}}$$

(2.1)

$$X_2 := (Rx, Ry, Rz, Tx, Ty, Tz) \rightarrow \frac{Ry - Ty}{\text{sqrt}((Rx - Tx)^2 + (Ry - Ty)^2 + (Rz - Tz)^2)} :$$

$$X_2(Rx, Ry, Rz, Tx, Ty, Tz) :$$

$$\text{subs}(Rx^2 - 2 Rx Tx + Tx^2 + Ry^2 - 2 Ry Ty + Ty^2 + Rz^2 - 2 Rz Tz + Tz^2 = R2, \%) : \\ \text{factor}(\%);$$

$$\frac{Ry - Ty}{\sqrt{R2}}$$

(2.2)

$$X_3 := (Rx, Ry, Rz, Tx, Ty, Tz) \rightarrow \frac{Rz - Tz}{\text{sqrt}((Rx - Tx)^2 + (Ry - Ty)^2 + (Rz - Tz)^2)} :$$

$$X_3(Rx, Ry, Rz, Tx, Ty, Tz) :$$

$$\text{subs}(Rx^2 - 2 Rx Tx + Tx^2 + Ry^2 - 2 Ry Ty + Ty^2 + Rz^2 - 2 Rz Tz + Tz^2 = R2, \%) : \\ \text{factor}(\%);$$

$$\frac{Rz - Tz}{\sqrt{R2}}$$

(2.3)

$$Y_1 := (Rx, Ry, Rz, Tx, Ty, Tz) \rightarrow - \frac{Ry - Ty}{\text{sqrt}((Rx - Tx)^2 + (Ry - Ty)^2)} :$$

$$Y_1(Rx, Ry, Rz, Tx, Ty, Tz) :$$

$$\text{subs}(Rx^2 - 2 Rx Tx + Tx^2 + Ry^2 - 2 Ry Ty + Ty^2 + Rz^2 - 2 Rz Tz + Tz^2 = R2, \%) : \\ \text{subs}(Rx^2 - 2 Rx Tx + Tx^2 + Ry^2 - 2 Ry Ty + Ty^2 = RY2, \%) : \\ \text{factor}(\%);$$

$$- \frac{Ry - Ty}{\sqrt{RY2}}$$

(2.4)

$$Y_2 := (Rx, Ry, Rz, Tx, Ty, Tz) \rightarrow \frac{Rx - Tx}{\text{sqrt}((Rx - Tx)^2 + (Ry - Ty)^2)} :$$

$$Y_2(Rx, Ry, Rz, Tx, Ty, Tz) :$$

$$\text{subs}(Rx^2 - 2 Rx Tx + Tx^2 + Ry^2 - 2 Ry Ty + Ty^2 + Rz^2 - 2 Rz Tz + Tz^2 = R2, \%) : \\ \text{subs}(Rx^2 - 2 Rx Tx + Tx^2 + Ry^2 - 2 Ry Ty + Ty^2 = RY2, \%) : \\ \text{factor}(\%);$$

$$\frac{Rx - Tx}{\sqrt{RY2}}$$

(2.5)

$Z_1 := (Rx, Ry, Rz, Tx, Ty, Tz) \rightarrow$

$$- \frac{(Rx - Tx) \cdot (Rz - Tz)}{\sqrt{(Rx - Tx)^2 + (Ry - Ty)^2 + (Rz - Tz)^2} \cdot \sqrt{(Rx - Tx)^2 + (Ry - Ty)^2}} :$$

$Z_1(Rx, Ry, Rz, Tx, Ty, Tz) :$

$subs(Rx^2 - 2 Rx Tx + Tx^2 + Ry^2 - 2 Ry Ty + Ty^2 + Rz^2 - 2 Rz Tz + Tz^2 = R2, \%) :$   
 $subs(Rx^2 - 2 Rx Tx + Tx^2 + Ry^2 - 2 Ry Ty + Ty^2 = RY2, \%) :$   
 $factor(\%);$

$$- \frac{(Rx - Tx) (Rz - Tz)}{\sqrt{R2} \sqrt{RY2}}$$

(2.6)

$Z_2 := (Rx, Ry, Rz, Tx, Ty, Tz) \rightarrow$

$$- \frac{(Ry - Ty) \cdot (Rz - Tz)}{\sqrt{(Rx - Tx)^2 + (Ry - Ty)^2 + (Rz - Tz)^2} \cdot \sqrt{(Rx - Tx)^2 + (Ry - Ty)^2}} :$$

$Z_2(Rx, Ry, Rz, Tx, Ty, Tz) :$

$subs(Rx^2 - 2 Rx Tx + Tx^2 + Ry^2 - 2 Ry Ty + Ty^2 + Rz^2 - 2 Rz Tz + Tz^2 = R2, \%) :$   
 $subs(Rx^2 - 2 Rx Tx + Tx^2 + Ry^2 - 2 Ry Ty + Ty^2 = RY2, \%) :$   
 $factor(\%);$

$$- \frac{(Ry - Ty) (Rz - Tz)}{\sqrt{R2} \sqrt{RY2}}$$

(2.7)

$Z_3 := (Rx, Ry, Rz, Tx, Ty, Tz)$

$$\rightarrow \frac{(Rx - Tx)^2 + (Ry - Ty)^2}{\sqrt{(Rx - Tx)^2 + (Ry - Ty)^2 + (Rz - Tz)^2} \cdot \sqrt{(Rx - Tx)^2 + (Ry - Ty)^2}} :$$

$Z_3(Rx, Ry, Rz, Tx, Ty, Tz) :$

$subs(Rx^2 - 2 Rx Tx + Tx^2 + Ry^2 - 2 Ry Ty + Ty^2 + Rz^2 - 2 Rz Tz + Tz^2 = R2, \%) :$   
 $subs(Rx^2 - 2 Rx Tx + Tx^2 + Ry^2 - 2 Ry Ty + Ty^2 = RY2, \%) :$   
 $factor(\%);$

$$\frac{Rx^2 - 2 Rx Tx + Tx^2 + Ry^2 - 2 Ry Ty + Ty^2}{\sqrt{R2} \sqrt{RY2}}$$

(2.8)

## Derived ideal integrals

Here the simple derivative of the integrals are evaluated.

1) First we have the (ss|ss) integrals

$diff(SSSS(Rx, Ry, Rz, Tx, Ty, Tz), Rx) :$

$subs(Rx^2 - 2 Rx Tx + Tx^2 + Ry^2 - 2 Ry Ty + Ty^2 + Rz^2 - 2 Rz Tz + Tz^2 = R2, \%) :$   
 $factor(\%);$

$$- \frac{Rx - Tx}{R2^{3/2}}$$

(3.1)

$diff(SSSS(Rx, Ry, Rz, Tx, Ty, Tz), Ry) :$

$subs(Rx^2 - 2 Rx Tx + Tx^2 + Ry^2 - 2 Ry Ty + Ty^2 + Rz^2 - 2 Rz Tz + Tz^2 = R2, \%) :$

factor(%);

$$- \frac{Ry - Ty}{R2^{3/2}} \quad (3.2)$$

diff(SSSS(Rx, Ry, Rz, Tx, Ty, Tz), Rz) :

subs( $Rx^2 - 2 Rx Tx + Tx^2 + Ry^2 - 2 Ry Ty + Ty^2 + Rz^2 - 2 Rz Tz + Tz^2 = R2$ , %) :

factor(%);

$$- \frac{Rz - Tz}{R2^{3/2}} \quad (3.3)$$

**2) Second we have the (ss|p\_op\_o) integrals**

diff(SSPOPO(Rx, Ry, Rz, Tx, Ty, Tz, D2), Rx);

$$- \frac{1}{4} \frac{2 Rx - 2 Tx}{(Rx^2 - 2 Rx Tx + Tx^2 + Ry^2 - 2 Ry Ty + Ty^2 + Rz^2 - 2 Rz Tz + Tz^2)^{3/2}} \quad (3.4)$$

$$- \frac{1}{4} \frac{2 Rx - 2 Tx}{(Rx^2 - 2 Rx Tx + Tx^2 + Ry^2 - 2 Ry Ty + Ty^2 + Rz^2 - 2 Rz Tz + Tz^2 + 4 D2^2)^{3/2}} \quad (3.5)$$

(3.6)

diff(SSPOPO(Rx, Ry, Rz, Tx, Ty, Tz, D2), Ry);

$$- \frac{1}{4} \frac{2 Ry - 2 Ty}{(Rx^2 - 2 Rx Tx + Tx^2 + Ry^2 - 2 Ry Ty + Ty^2 + Rz^2 - 2 Rz Tz + Tz^2)^{3/2}} \quad (3.7)$$

$$- \frac{1}{4} \frac{2 Ry - 2 Ty}{(Rx^2 - 2 Rx Tx + Tx^2 + Ry^2 - 2 Ry Ty + Ty^2 + Rz^2 - 2 Rz Tz + Tz^2 + 4 D2^2)^{3/2}} \quad (3.8)$$

(3.9)

diff(SSPOPO(Rx, Ry, Rz, Tx, Ty, Tz, D2), Rz);

$$- \frac{1}{4} \frac{2 Rz - 2 Tz}{(Rx^2 - 2 Rx Tx + Tx^2 + Ry^2 - 2 Ry Ty + Ty^2 + Rz^2 - 2 Rz Tz + Tz^2)^{3/2}} \quad (3.10)$$

$$- \frac{1}{4} \frac{2 Rz - 2 Tz}{(Rx^2 - 2 Rx Tx + Tx^2 + Ry^2 - 2 Ry Ty + Ty^2 + Rz^2 - 2 Rz Tz + Tz^2 + 4 D2^2)^{3/2}} \quad (3.11)$$

(3.12)

**3) Third we have the (ss|p\_sp\_s) integrals**

diff(SSPZPZ(Rx, Ry, Rz, Tx, Ty, Tz, D2), Rx) :

subs( $Rx^2 - 2 Rx Tx + Tx^2 + Ry^2 - 2 Ry Ty + Ty^2 + Rz^2 - 2 Rz Tz + Tz^2 = R2$ , %) :

factor(%);

$$- \frac{(Rx - Tx) (R2^2 - 2 R2 D2^2 + 8 D2^4)}{R2^{3/2} (\sqrt{R2} + 2 D2)^2 (-\sqrt{R2} + 2 D2)^2} \quad (3.13)$$

diff(SSPZPZ(Rx, Ry, Rz, Tx, Ty, Tz, D2), Ry) :

subs( $Rx^2 - 2 Rx Tx + Tx^2 + Ry^2 - 2 Ry Ty + Ty^2 + Rz^2 - 2 Rz Tz + Tz^2 = R2$ , %) :

factor(%);

$$- \frac{(R_y - T_y) (R^2 - 2 R D^2 + 8 D^4)}{R^{3/2} (\sqrt{R} + 2 D)^2 (-\sqrt{R} + 2 D)^2} \quad (3.14)$$

*diff*(SSPZPZ(Rx, Ry, Rz, Tx, Ty, Tz, D2), Rz) :

*subs*( $Rx^2 - 2 Rx Tx + Tx^2 + Ry^2 - 2 Ry Ty + Ty^2 + Rz^2 - 2 Rz Tz + Tz^2 = R2$ , %) :  
*factor*(%);

$$- \frac{(R_z - T_z) (R^2 - 2 R D^2 + 8 D^4)}{R^{3/2} (\sqrt{R} + 2 D)^2 (-\sqrt{R} + 2 D)^2} \quad (3.15)$$

**4) Finally we have the (ss|sp\_s) integrals**

*diff*(SSSPZ(Rx, Ry, Rz, Tx, Ty, Tz, D1), Rx) :

*subs*( $Rx^2 - 2 Rx Tx + Tx^2 + Ry^2 - 2 Ry Ty + Ty^2 + Rz^2 - 2 Rz Tz + Tz^2 = R2$ , %) :  
*factor*(%);

$$\frac{2 (Rx - Tx) D1}{(\sqrt{R} + D1)^2 (-\sqrt{R} + D1)^2} \quad (3.16)$$

*diff*(SSSPZ(Rx, Ry, Rz, Tx, Ty, Tz, D1), Ry) :

*subs*( $Rx^2 - 2 Rx Tx + Tx^2 + Ry^2 - 2 Ry Ty + Ty^2 + Rz^2 - 2 Rz Tz + Tz^2 = R2$ , %) :  
*factor*(%);

$$\frac{2 (Ry - Ty) D1}{(\sqrt{R} + D1)^2 (-\sqrt{R} + D1)^2} \quad (3.17)$$

*diff*(SSSPZ(Rx, Ry, Rz, Tx, Ty, Tz, D1), Rz) :

*subs*( $Rx^2 - 2 Rx Tx + Tx^2 + Ry^2 - 2 Ry Ty + Ty^2 + Rz^2 - 2 Rz Tz + Tz^2 = R2$ , %) :  
*factor*(%);

$$\frac{2 (Rz - Tz) D1}{(\sqrt{R} + D1)^2 (-\sqrt{R} + D1)^2} \quad (3.18)$$

## Derived projection operators

The projection operators are

$$X = R - T$$

normalization of X is  $\text{sqrt}(1 - X[3] * X[3])$

$$Y = [-X[2], X[1], 0]$$

$$Z = X \times Y$$

In the manuscript, they are  $R = X$ ,  $u = Y$  and  $w = Z$

## Derivatives of projection operator X

**x[1]**

*diff*( $\frac{Rx - Tx}{\text{sqrt}((Rx - Tx)^2 + (Ry - Ty)^2 + (Rz - Tz)^2)}$ , Rx) :

*subs*( $Rx^2 - 2 Rx Tx + Tx^2 + Ry^2 - 2 Ry Ty + Ty^2 + Rz^2 - 2 Rz Tz + Tz^2 = R2$ , %) :

*factor*(%);

$$\frac{R2 - Rx^2 + 2 Rx Tx - Tx^2}{R2^{3/2}} \quad (4.1.1)$$

*diff*  $\left( \frac{Rx - Tx}{\text{sqrt}((Rx - Tx)^2 + (Ry - Ty)^2 + (Rz - Tz)^2)}, Ry \right) :$   
*subs*  $(Rx^2 - 2 Rx Tx + Tx^2 + Ry^2 - 2 Ry Ty + Ty^2 + Rz^2 - 2 Rz Tz + Tz^2 = R2, \%) :$   
*factor*(%);

$$- \frac{(Rx - Tx) (Ry - Ty)}{R2^{3/2}} \quad (4.1.2)$$

*diff*  $\left( \frac{Rx - Tx}{\text{sqrt}((Rx - Tx)^2 + (Ry - Ty)^2 + (Rz - Tz)^2)}, Rz \right) :$   
*subs*  $(Rx^2 - 2 Rx Tx + Tx^2 + Ry^2 - 2 Ry Ty + Ty^2 + Rz^2 - 2 Rz Tz + Tz^2 = R2, \%) :$   
*factor*(%);

$$- \frac{(Rx - Tx) (Rz - Tz)}{R2^{3/2}} \quad (4.1.3)$$

**x[2]**

*diff*  $\left( \frac{Ry - Ty}{\text{sqrt}((Rx - Tx)^2 + (Ry - Ty)^2 + (Rz - Tz)^2)}, Rx \right) :$   
*subs*  $(Rx^2 - 2 Rx Tx + Tx^2 + Ry^2 - 2 Ry Ty + Ty^2 + Rz^2 - 2 Rz Tz + Tz^2 = R2, \%) :$   
*factor*(%);

$$- \frac{(Rx - Tx) (Ry - Ty)}{R2^{3/2}} \quad (4.1.4)$$

*diff*  $\left( \frac{Ry - Ty}{\text{sqrt}((Rx - Tx)^2 + (Ry - Ty)^2 + (Rz - Tz)^2)}, Ry \right) :$   
*subs*  $(Rx^2 - 2 Rx Tx + Tx^2 + Ry^2 - 2 Ry Ty + Ty^2 + Rz^2 - 2 Rz Tz + Tz^2 = R2, \%) :$   
*factor*(%);

$$\frac{R2 - Ry^2 + 2 Ry Ty - Ty^2}{R2^{3/2}} \quad (4.1.5)$$

*diff*  $\left( \frac{Ry - Ty}{\text{sqrt}((Rx - Tx)^2 + (Ry - Ty)^2 + (Rz - Tz)^2)}, Rz \right) :$   
*subs*  $(Rx^2 - 2 Rx Tx + Tx^2 + Ry^2 - 2 Ry Ty + Ty^2 + Rz^2 - 2 Rz Tz + Tz^2 = R2, \%) :$   
*factor*(%);

$$- \frac{(Ry - Ty) (Rz - Tz)}{R2^{3/2}} \quad (4.1.6)$$

**x[3]**

*diff*  $\left( \frac{Rz - Tz}{\text{sqrt}((Rx - Tx)^2 + (Ry - Ty)^2 + (Rz - Tz)^2)}, Rx \right) :$   
*subs*  $(Rx^2 - 2 Rx Tx + Tx^2 + Ry^2 - 2 Ry Ty + Ty^2 + Rz^2 - 2 Rz Tz + Tz^2 = R2, \%) :$   
*factor*(%);

$$- \frac{(Rx - Tx) (Rz - Tz)}{R2^{3/2}} \quad (4.1.7)$$

$$\begin{aligned}
& \text{diff} \left( \frac{Rz - Tz}{\sqrt{(Rx - Tx)^2 + (Ry - Ty)^2 + (Rz - Tz)^2}}, Ry \right) : \\
& \text{subs}(Rx^2 - 2 Rx Tx + Tx^2 + Ry^2 - 2 Ry Ty + Ty^2 + Rz^2 - 2 Rz Tz + Tz^2 = R2, \%) : \\
& \text{factor}(\%); \\
& \quad - \frac{(Ry - Ty) (Rz - Tz)}{R2^{3/2}} \quad (4.1.8)
\end{aligned}$$

$$\begin{aligned}
& \text{diff} \left( \frac{Rz - Tz}{\sqrt{(Rx - Tx)^2 + (Ry - Ty)^2 + (Rz - Tz)^2}}, Rz \right) : \\
& \text{subs}(Rx^2 - 2 Rx Tx + Tx^2 + Ry^2 - 2 Ry Ty + Ty^2 + Rz^2 - 2 Rz Tz + Tz^2 = R2, \%) : \\
& \text{factor}(\%); \\
& \quad \frac{R2 - Rz^2 + 2 Rz Tz - Tz^2}{R2^{3/2}} \quad (4.1.9)
\end{aligned}$$

$$\begin{aligned}
& \mathbf{x[1]*x[1]} \\
& \text{diff} \left( \left( \frac{Rx - Tx}{\sqrt{(Rx - Tx)^2 + (Ry - Ty)^2 + (Rz - Tz)^2}} \right)^2, Rx \right) : \\
& \text{subs}(Rx^2 - 2 Rx Tx + Tx^2 + Ry^2 - 2 Ry Ty + Ty^2 + Rz^2 - 2 Rz Tz + Tz^2 = R2, \%) : \\
& \text{factor}(\%); \\
& \quad \frac{2 (Rx - Tx) (R2 - Rx^2 + 2 Rx Tx - Tx^2)}{R2^2} \quad (4.1.10)
\end{aligned}$$

$$\begin{aligned}
& \text{diff} \left( \left( \frac{Rx - Tx}{\sqrt{(Rx - Tx)^2 + (Ry - Ty)^2 + (Rz - Tz)^2}} \right)^2, Ry \right) : \\
& \text{subs}(Rx^2 - 2 Rx Tx + Tx^2 + Ry^2 - 2 Ry Ty + Ty^2 + Rz^2 - 2 Rz Tz + Tz^2 = R2, \%) : \\
& \text{factor}(\%); \\
& \quad - \frac{2 (Rx - Tx)^2 (Ry - Ty)}{R2^2} \quad (4.1.11)
\end{aligned}$$

$$\begin{aligned}
& \text{diff} \left( \left( \frac{Rx - Tx}{\sqrt{(Rx - Tx)^2 + (Ry - Ty)^2 + (Rz - Tz)^2}} \right)^2, Rz \right) : \\
& \text{subs}(Rx^2 - 2 Rx Tx + Tx^2 + Ry^2 - 2 Ry Ty + Ty^2 + Rz^2 - 2 Rz Tz + Tz^2 = R2, \%) : \\
& \text{factor}(\%); \\
& \quad - \frac{2 (Rx - Tx)^2 (Rz - Tz)}{R2^2} \quad (4.1.12)
\end{aligned}$$

$$\begin{aligned}
& \mathbf{x[2]*x[2]} \\
& \text{diff} \left( \left( \frac{Ry - Ty}{\sqrt{(Rx - Tx)^2 + (Ry - Ty)^2 + (Rz - Tz)^2}} \right)^2, Rx \right) : \\
& \text{subs}(Rx^2 - 2 Rx Tx + Tx^2 + Ry^2 - 2 Ry Ty + Ty^2 + Rz^2 - 2 Rz Tz + Tz^2 = R2, \%) : \\
& \text{factor}(\%); \\
& \quad - \frac{2 (Ry - Ty)^2 (Rx - Tx)}{R2^2} \quad (4.1.13)
\end{aligned}$$

$$\begin{aligned}
& \text{diff} \left( \left( \frac{Ry - Ty}{\text{sqrt}((Rx - Tx)^2 + (Ry - Ty)^2 + (Rz - Tz)^2)} \right)^2, Ry \right) : \\
& \text{subs}(Rx^2 - 2 Rx Tx + Tx^2 + Ry^2 - 2 Ry Ty + Ty^2 + Rz^2 - 2 Rz Tz + Tz^2 = R2, \%) : \\
& \text{factor}(\%); \\
& \frac{2 (Ry - Ty) (R2 - Ry^2 + 2 Ry Ty - Ty^2)}{R2^2} \tag{4.1.14}
\end{aligned}$$

$$\begin{aligned}
& \text{diff} \left( \left( \frac{Ry - Ty}{\text{sqrt}((Rx - Tx)^2 + (Ry - Ty)^2 + (Rz - Tz)^2)} \right)^2, Rz \right) : \\
& \text{subs}(Rx^2 - 2 Rx Tx + Tx^2 + Ry^2 - 2 Ry Ty + Ty^2 + Rz^2 - 2 Rz Tz + Tz^2 = R2, \%) : \\
& \text{factor}(\%); \\
& - \frac{2 (Ry - Ty)^2 (Rz - Tz)}{R2^2} \tag{4.1.15}
\end{aligned}$$

$$\begin{aligned}
& \mathbf{x[3]*x[3]} \\
& \text{diff} \left( \left( \frac{Rz - Tz}{\text{sqrt}((Rx - Tx)^2 + (Ry - Ty)^2 + (Rz - Tz)^2)} \right)^2, Rx \right) : \\
& \text{subs}(Rx^2 - 2 Rx Tx + Tx^2 + Ry^2 - 2 Ry Ty + Ty^2 + Rz^2 - 2 Rz Tz + Tz^2 = R2, \%) : \\
& \text{factor}(\%); \\
& - \frac{2 (Rz - Tz)^2 (Rx - Tx)}{R2^2} \tag{4.1.16}
\end{aligned}$$

$$\begin{aligned}
& \text{diff} \left( \left( \frac{Rz - Tz}{\text{sqrt}((Rx - Tx)^2 + (Ry - Ty)^2 + (Rz - Tz)^2)} \right)^2, Ry \right) : \\
& \text{subs}(Rx^2 - 2 Rx Tx + Tx^2 + Ry^2 - 2 Ry Ty + Ty^2 + Rz^2 - 2 Rz Tz + Tz^2 = R2, \%) : \\
& \text{factor}(\%); \\
& - \frac{2 (Rz - Tz)^2 (Ry - Ty)}{R2^2} \tag{4.1.17}
\end{aligned}$$

$$\begin{aligned}
& \text{diff} \left( \left( \frac{Rz - Tz}{\text{sqrt}((Rx - Tx)^2 + (Ry - Ty)^2 + (Rz - Tz)^2)} \right)^2, Rz \right) : \\
& \text{subs}(Rx^2 - 2 Rx Tx + Tx^2 + Ry^2 - 2 Ry Ty + Ty^2 + Rz^2 - 2 Rz Tz + Tz^2 = R2, \%) : \\
& \text{factor}(\%); \\
& \frac{2 (Rz - Tz) (R2 - Rz^2 + 2 Rz Tz - Tz^2)}{R2^2} \tag{4.1.18}
\end{aligned}$$

$$\begin{aligned}
& \mathbf{x[2]*x[1]} \\
& \text{diff} \left( \frac{Ry - Ty}{\text{sqrt}((Rx - Tx)^2 + (Ry - Ty)^2 + (Rz - Tz)^2)} \cdot \frac{Rx - Tx}{\text{sqrt}((Rx - Tx)^2 + (Ry - Ty)^2 + (Rz - Tz)^2)}, Rx \right); \\
& - \frac{(Ry - Ty) (Rx - Tx) (2 Rx - 2 Tx)}{(Rx^2 - 2 Rx Tx + Tx^2 + Ry^2 - 2 Ry Ty + Ty^2 + Rz^2 - 2 Rz Tz + Tz^2)^2} \\
& + \frac{Ry - Ty}{Rx^2 - 2 Rx Tx + Tx^2 + Ry^2 - 2 Ry Ty + Ty^2 + Rz^2 - 2 Rz Tz + Tz^2} \tag{4.1.19}
\end{aligned}$$



$$\begin{aligned}
& \text{diff} \left( \frac{Ry - Ty}{\text{sqrt}((Rx - Tx)^2 + (Ry - Ty)^2 + (Rz - Tz)^2)} \right. \\
& \quad \cdot \frac{Rx - Tx}{\text{sqrt}((Rx - Tx)^2 + (Ry - Ty)^2 + (Rz - Tz)^2)}, Ry \Bigg); \\
& \quad - \frac{Rx - Tx}{\frac{Rx^2 - 2 Rx Tx + Tx^2 + Ry^2 - 2 Ry Ty + Ty^2 + Rz^2 - 2 Rz Tz + Tz^2}{(Ry - Ty)(Rx - Tx)(2 Ry - 2 Ty)}} \\
& \quad - \frac{(Rx^2 - 2 Rx Tx + Tx^2 + Ry^2 - 2 Ry Ty + Ty^2 + Rz^2 - 2 Rz Tz + Tz^2)^2}{(Ry - Ty)(Rx - Tx)(2 Ry - 2 Ty)}
\end{aligned} \tag{4.1.20}$$

$$\begin{aligned}
& \text{diff} \left( \frac{Ry - Ty}{\text{sqrt}((Rx - Tx)^2 + (Ry - Ty)^2 + (Rz - Tz)^2)} \right. \\
& \quad \cdot \frac{Rx - Tx}{\text{sqrt}((Rx - Tx)^2 + (Ry - Ty)^2 + (Rz - Tz)^2)}, Rz \Bigg); \\
& \quad - \frac{(Ry - Ty)(Rx - Tx)(2 Rz - 2 Tz)}{(Rx^2 - 2 Rx Tx + Tx^2 + Ry^2 - 2 Ry Ty + Ty^2 + Rz^2 - 2 Rz Tz + Tz^2)^2}
\end{aligned} \tag{4.1.21}$$

$$\begin{aligned}
& \mathbf{x[3]*x[1]} \\
& \text{diff} \left( \frac{Rz - Tz}{\text{sqrt}((Rx - Tx)^2 + (Ry - Ty)^2 + (Rz - Tz)^2)} \right. \\
& \quad \cdot \frac{Rx - Tx}{\text{sqrt}((Rx - Tx)^2 + (Ry - Ty)^2 + (Rz - Tz)^2)}, Rx \Bigg); \\
& \quad - \frac{(Rz - Tz)(Rx - Tx)(2 Rx - 2 Tx)}{(Rx^2 - 2 Rx Tx + Tx^2 + Ry^2 - 2 Ry Ty + Ty^2 + Rz^2 - 2 Rz Tz + Tz^2)^2} \\
& \quad + \frac{Rz - Tz}{Rx^2 - 2 Rx Tx + Tx^2 + Ry^2 - 2 Ry Ty + Ty^2 + Rz^2 - 2 Rz Tz + Tz^2}
\end{aligned} \tag{4.1.22}$$

$$\begin{aligned}
& \text{diff} \left( \frac{Rz - Tz}{\text{sqrt}((Rx - Tx)^2 + (Ry - Ty)^2 + (Rz - Tz)^2)} \right. \\
& \quad \cdot \frac{Rx - Tx}{\text{sqrt}((Rx - Tx)^2 + (Ry - Ty)^2 + (Rz - Tz)^2)}, Ry \Bigg); \\
& \quad - \frac{(Rz - Tz)(Rx - Tx)(2 Ry - 2 Ty)}{(Rx^2 - 2 Rx Tx + Tx^2 + Ry^2 - 2 Ry Ty + Ty^2 + Rz^2 - 2 Rz Tz + Tz^2)^2}
\end{aligned} \tag{4.1.23}$$

$$\begin{aligned}
& \text{diff} \left( \frac{Rz - Tz}{\text{sqrt}((Rx - Tx)^2 + (Ry - Ty)^2 + (Rz - Tz)^2)} \right. \\
& \quad \cdot \frac{Rx - Tx}{\text{sqrt}((Rx - Tx)^2 + (Ry - Ty)^2 + (Rz - Tz)^2)}, Rz \Bigg); \\
& \quad - \frac{Rx - Tx}{\frac{Rx^2 - 2 Rx Tx + Tx^2 + Ry^2 - 2 Ry Ty + Ty^2 + Rz^2 - 2 Rz Tz + Tz^2}{(Rz - Tz)(Rx - Tx)(2 Rz - 2 Tz)}} \\
& \quad - \frac{(Rx^2 - 2 Rx Tx + Tx^2 + Ry^2 - 2 Ry Ty + Ty^2 + Rz^2 - 2 Rz Tz + Tz^2)^2}{(Rz - Tz)(Rx - Tx)(2 Rz - 2 Tz)}
\end{aligned} \tag{4.1.24}$$

$$\begin{aligned}
& \mathbf{x[3]*x[2]} \\
& \text{diff} \left( \frac{Rz - Tz}{\text{sqrt}((Rx - Tx)^2 + (Ry - Ty)^2 + (Rz - Tz)^2)} \right.
\end{aligned}$$

$$\begin{aligned} & \cdot \frac{Ry - Ty}{\sqrt{(Rx - Tx)^2 + (Ry - Ty)^2 + (Rz - Tz)^2}}, Rx \Big); \\ & - \frac{(Rz - Tz) (Ry - Ty) (2 Rx - 2 Tx)}{(Rx^2 - 2 Rx Tx + Tx^2 + Ry^2 - 2 Ry Ty + Ty^2 + Rz^2 - 2 Rz Tz + Tz^2)^2} \end{aligned} \quad (4.1.25)$$

$$\begin{aligned} & diff \left( \frac{Rz - Tz}{\sqrt{(Rx - Tx)^2 + (Ry - Ty)^2 + (Rz - Tz)^2}} \right. \\ & \cdot \frac{Ry - Ty}{\sqrt{(Rx - Tx)^2 + (Ry - Ty)^2 + (Rz - Tz)^2}}, Ry \Big); \\ & - \frac{(Rz - Tz) (Ry - Ty) (2 Ry - 2 Ty)}{(Rx^2 - 2 Rx Tx + Tx^2 + Ry^2 - 2 Ry Ty + Ty^2 + Rz^2 - 2 Rz Tz + Tz^2)^2} \end{aligned} \quad (4.1.26)$$

$$\begin{aligned} & + \frac{Rz - Tz}{Rx^2 - 2 Rx Tx + Tx^2 + Ry^2 - 2 Ry Ty + Ty^2 + Rz^2 - 2 Rz Tz + Tz^2} \\ & diff \left( \frac{Rz - Tz}{\sqrt{(Rx - Tx)^2 + (Ry - Ty)^2 + (Rz - Tz)^2}} \right. \\ & \cdot \frac{Ry - Ty}{\sqrt{(Rx - Tx)^2 + (Ry - Ty)^2 + (Rz - Tz)^2}}, Rz \Big); \\ & - \frac{Ry - Ty}{Rx^2 - 2 Rx Tx + Tx^2 + Ry^2 - 2 Ry Ty + Ty^2 + Rz^2 - 2 Rz Tz + Tz^2} \\ & - \frac{(Rz - Tz) (Ry - Ty) (2 Rz - 2 Tz)}{(Rx^2 - 2 Rx Tx + Tx^2 + Ry^2 - 2 Ry Ty + Ty^2 + Rz^2 - 2 Rz Tz + Tz^2)^2} \end{aligned} \quad (4.1.27)$$

## Derivatives of projection operator Y

$$y[1]*y[1] = x[2]*x[2] / (1-x[3]*x[3])$$

$$YII_x := (Rx, Ry, Rz, Tx, Ty, Tz) \rightarrow diff \left( Y_1(Rx, Ry, Rz, Tx, Ty, Tz) \cdot Y_1(Rx, Ry, Rz, Tx, Ty, Tz), \right. \\ \left. Rx \right) :$$

$$YII_x(Rx, Ry, Rz, Tx, Ty, Tz);$$

$$- \frac{(Ry - Ty)^2 (2 Rx - 2 Tx)}{(Rx^2 - 2 Rx Tx + Tx^2 + Ry^2 - 2 Ry Ty + Ty^2)^2} \quad (4.2.1)$$

$$subs(Rx^2 - 2 Rx Tx + Tx^2 + Ry^2 - 2 Ry Ty + Ty^2 = RY2, \%);$$

$$- \frac{(Ry - Ty)^2 (2 Rx - 2 Tx)}{RY2^2} \quad (4.2.2)$$

$$YII_y := (Rx, Ry, Rz, Tx, Ty, Tz) \rightarrow diff \left( Y_1(Rx, Ry, Rz, Tx, Ty, Tz) \cdot Y_1(Rx, Ry, Rz, Tx, Ty, Tz), \right. \\ \left. Ry \right) :$$

$$YII_y(Rx, Ry, Rz, Tx, Ty, Tz);$$

$$\begin{aligned} & \frac{2 (Ry - Ty)}{Rx^2 - 2 Rx Tx + Tx^2 + Ry^2 - 2 Ry Ty + Ty^2} \\ & - \frac{(Ry - Ty)^2 (2 Ry - 2 Ty)}{(Rx^2 - 2 Rx Tx + Tx^2 + Ry^2 - 2 Ry Ty + Ty^2)^2} \end{aligned} \quad (4.2.3)$$

(4.2.4)

$$\text{subs}(Rx^2 - 2 Rx Tx + Tx^2 + Ry^2 - 2 Ry Ty + Ty^2 = RY2, \%);$$

$$\frac{2 (Ry - Ty)}{RY2} - \frac{(Ry - Ty)^2 (2 Ry - 2 Ty)}{RY2^2} \quad (4.2.5)$$

$$Y1I_z := (Rx, Ry, Rz, Tx, Ty, Tz) \rightarrow \text{diff} (Y_1(Rx, Ry, Rz, Tx, Ty, Tz) \cdot Y_1(Rx, Ry, Rz, Tx, Ty, Tz), \\ Rx) :$$

$$Y1I_z(Rx, Ry, Rz, Tx, Ty, Tz);$$

0

(4.2.6)

(4.2.7)

$$\text{subs}(Rx^2 - 2 Rx Tx + Tx^2 + Ry^2 - 2 Ry Ty + Ty^2 = RY2, \%);$$

0

(4.2.8)

$$y[2]*y[1] = -x[1]*x[2] / (1-x[3]*x[3])$$

$$Y2I_x := (Rx, Ry, Rz, Tx, Ty, Tz) \rightarrow \text{diff} (Y_2(Rx, Ry, Rz, Tx, Ty, Tz) \cdot Y_1(Rx, Ry, Rz, Tx, Ty, Tz), \\ Rx) :$$

$$Y2I_x(Rx, Ry, Rz, Tx, Ty, Tz);$$

$$- \frac{Ry - Ty}{Rx^2 - 2 Rx Tx + Tx^2 + Ry^2 - 2 Ry Ty + Ty^2} \quad (4.2.9)$$

$$+ \frac{(Rx - Tx) (Ry - Ty) (2 Rx - 2 Tx)}{(Rx^2 - 2 Rx Tx + Tx^2 + Ry^2 - 2 Ry Ty + Ty^2)^2}$$

(4.2.10)

$$\text{subs}(Rx^2 - 2 Rx Tx + Tx^2 + Ry^2 - 2 Ry Ty + Ty^2 = RY2, \%);$$

$$- \frac{Ry - Ty}{RY2} + \frac{(Rx - Tx) (Ry - Ty) (2 Rx - 2 Tx)}{RY2^2}$$

(4.2.11)

$$Y2I_y := (Rx, Ry, Rz, Tx, Ty, Tz) \rightarrow \text{diff} (Y_2(Rx, Ry, Rz, Tx, Ty, Tz) \cdot Y_1(Rx, Ry, Rz, Tx, Ty, Tz), \\ Ry) :$$

$$Y2I_y(Rx, Ry, Rz, Tx, Ty, Tz);$$

$$\frac{(Rx - Tx) (Ry - Ty) (2 Ry - 2 Ty)}{(Rx^2 - 2 Rx Tx + Tx^2 + Ry^2 - 2 Ry Ty + Ty^2)^2} \quad (4.2.12)$$

$$- \frac{Rx - Tx}{Rx^2 - 2 Rx Tx + Tx^2 + Ry^2 - 2 Ry Ty + Ty^2}$$

(4.2.13)

$$\text{subs}(Rx^2 - 2 Rx Tx + Tx^2 + Ry^2 - 2 Ry Ty + Ty^2 = RY2, \%);$$

$$\frac{(Rx - Tx) (Ry - Ty) (2 Ry - 2 Ty)}{RY2^2} - \frac{Rx - Tx}{RY2}$$

(4.2.14)

$$Y2I_z := (Rx, Ry, Rz, Tx, Ty, Tz) \rightarrow \text{diff} (Y_2(Rx, Ry, Rz, Tx, Ty, Tz) \cdot Y_1(Rx, Ry, Rz, Tx, Ty, Tz), \\ Rz) :$$

$$Y2I_z(Rx, Ry, Rz, Tx, Ty, Tz);$$

0

(4.2.15)

(4.2.16)

$$\text{subs}(Rx^2 - 2 Rx Tx + Tx^2 + Ry^2 - 2 Ry Ty + Ty^2 = RY2, \%);$$

0

(4.2.17)

$$y[2]*y[2] = x[1]*x[1] / (1-x[3]*x[3])$$

$$Y22_x := (Rx, Ry, Rz, Tx, Ty, Tz) \rightarrow \text{diff} (Y_2(Rx, Ry, Rz, Tx, Ty, Tz) \cdot Y_2(Rx, Ry, Rz, Tx, Ty, Tz), \\ Rx) :$$

$$Y22_x(Rx, Ry, Rz, Tx, Ty, Tz);$$

$$\frac{2 (Rx - Tx)}{Rx^2 - 2 Rx Tx + Tx^2 + Ry^2 - 2 Ry Ty + Ty^2} \\ - \frac{(Rx - Tx)^2 (2 Rx - 2 Tx)}{(Rx^2 - 2 Rx Tx + Tx^2 + Ry^2 - 2 Ry Ty + Ty^2)^2} \quad (4.2.18)$$

$$\#eval(\%, \{Rx = -16.692327595, Ry = 2.053546334, Rz = 4.935321773, Tx = -16.319510615, Ty \\ = 3.200959013, Tz = 8.115683388, D2 = 0.512573800\});$$

$$\text{subs}(Rx^2 - 2 Rx Tx + Tx^2 + Ry^2 - 2 Ry Ty + Ty^2 = RY2, \%);$$

$$\frac{2 (Rx - Tx)}{RY2} - \frac{(Rx - Tx)^2 (2 Rx - 2 Tx)}{RY2^2} \quad (4.2.19)$$

$$Y22_y := (Rx, Ry, Rz, Tx, Ty, Tz) \rightarrow \text{diff} (Y_2(Rx, Ry, Rz, Tx, Ty, Tz) \cdot Y_2(Rx, Ry, Rz, Tx, Ty, Tz), \\ Ry) :$$

$$Y22_y(Rx, Ry, Rz, Tx, Ty, Tz);$$

$$- \frac{(Rx - Tx)^2 (2 Ry - 2 Ty)}{(Rx^2 - 2 Rx Tx + Tx^2 + Ry^2 - 2 Ry Ty + Ty^2)^2} \quad (4.2.20)$$

$$\#eval(\%, \{Rx = -16.692327595, Ry = 2.053546334, Rz = 4.935321773, Tx = -16.319510615, Ty \\ = 3.200959013, Tz = 8.115683388, D2 = 0.512573800\});$$

$$\text{subs}(Rx^2 - 2 Rx Tx + Tx^2 + Ry^2 - 2 Ry Ty + Ty^2 = RY2, \%);$$

$$- \frac{(Rx - Tx)^2 (2 Ry - 2 Ty)}{RY2^2} \quad (4.2.21)$$

$$Y22_z := (Rx, Ry, Rz, Tx, Ty, Tz) \rightarrow \text{diff} (Y_2(Rx, Ry, Rz, Tx, Ty, Tz) \cdot Y_2(Rx, Ry, Rz, Tx, Ty, Tz), \\ Rz) :$$

(4.2.22)

$$\text{subs}(Rx^2 - 2 Rx Tx + Tx^2 + Ry^2 - 2 Ry Ty + Ty^2 = RY2, \%);$$

$$(Rx, Ry, Rz, Tx, Ty, Tz) \rightarrow \frac{\partial}{\partial Rz} (Y_2(Rx, Ry, Rz, Tx, Ty, Tz)^2) \quad (4.2.23)$$

## Derivatives of projection operator Z

$$z[1]*z[1]$$

$$Z11_x := (Rx, Ry, Rz, Tx, Ty, Tz) \rightarrow \text{diff} (Z_1(Rx, Ry, Rz, Tx, Ty, Tz) \cdot Z_1(Rx, Ry, Rz, Tx, Ty, Tz), \\ Rx) :$$

$$Z11_x(Rx, Ry, Rz, Tx, Ty, Tz);$$

$$(2 (Rx - Tx) (Rz - Tz)^2) / ((Rx^2 - 2 Rx Tx + Tx^2 + Ry^2 - 2 Ry Ty + Ty^2 + Rz^2$$

$$\begin{aligned}
& -2 R_z T_z + T_z^2) (R_x^2 - 2 R_x T_x + T_x^2 + R_y^2 - 2 R_y T_y + T_y^2) - ((R_x - T_x)^2 (R_z - T_z)^2 (2 R_x - \\
& + T_y^2)) - ((R_x - T_x)^2 (R_z - T_z)^2 (2 R_x - 2 T_x)) / ((R_x^2 - 2 R_x T_x + T_x^2 \\
& + R_y^2 - 2 R_y T_y + T_y^2 + R_z^2 - 2 R_z T_z + T_z^2) (R_x^2 - 2 R_x T_x + T_x^2 + R_y^2 \\
& - 2 R_y T_y + T_y^2)^2)
\end{aligned}$$

#eval(% , {Rx=-16.692327595, Ry=2.053546334, Rz=4.935321773, Tx=-16.319510615, Ty=3.200959013, Tz=8.115683388, D2=0.512573800});

subs(Rx^2 - 2 Rx Tx + Tx^2 + Ry^2 - 2 Ry Ty + Ty^2 + Rz^2 - 2 Rz Tz + Tz^2 = R2, %):

subs(Rx^2 - 2 Rx Tx + Tx^2 + Ry^2 - 2 Ry Ty + Ty^2 = RY2, %);

$$\begin{aligned}
& \frac{2 (R_x - T_x) (R_z - T_z)^2}{R2 RY2} - \frac{(R_x - T_x)^2 (R_z - T_z)^2 (2 R_x - 2 T_x)}{R2^2 RY2} \\
& - \frac{(R_x - T_x)^2 (R_z - T_z)^2 (2 R_x - 2 T_x)}{R2 RY2^2}
\end{aligned} \tag{4.3.2}$$

Z11<sub>y</sub> := (Rx, Ry, Rz, Tx, Ty, Tz) → diff (Z<sub>1</sub>(Rx, Ry, Rz, Tx, Ty, Tz) · Z<sub>1</sub>(Rx, Ry, Rz, Tx, Ty, Tz),  
Ry):

Z11<sub>y</sub>(Rx, Ry, Rz, Tx, Ty, Tz);

$$\begin{aligned}
& -((R_x - T_x)^2 (R_z - T_z)^2 (2 R_y - 2 T_y)) / ((R_x^2 - 2 R_x T_x + T_x^2 + R_y^2 - 2 R_y T_y + T_y^2 \\
& + R_z^2 - 2 R_z T_z + T_z^2)^2 (R_x^2 - 2 R_x T_x + T_x^2 + R_y^2 - 2 R_y T_y + T_y^2)) \\
& - ((R_x - T_x)^2 (R_z - T_z)^2 (2 R_y - 2 T_y)) / ((R_x^2 - 2 R_x T_x + T_x^2 + R_y^2 - 2 R_y T_y + T_y^2 + R_z^2 - 2 \\
& + T_y^2)^2)
\end{aligned} \tag{4.3.4}$$

subs(Rx^2 - 2 Rx Tx + Tx^2 + Ry^2 - 2 Ry Ty + Ty^2 + Rz^2 - 2 Rz Tz + Tz^2 = R2, %):

subs(Rx^2 - 2 Rx Tx + Tx^2 + Ry^2 - 2 Ry Ty + Ty^2 = RY2, %);

$$\begin{aligned}
& - \frac{(R_x - T_x)^2 (R_z - T_z)^2 (2 R_y - 2 T_y)}{R2^2 RY2} - \frac{(R_x - T_x)^2 (R_z - T_z)^2 (2 R_y - 2 T_y)}{R2 RY2^2}
\end{aligned} \tag{4.3.5}$$

Z11<sub>z</sub> := (Rx, Ry, Rz, Tx, Ty, Tz) → diff (Z<sub>1</sub>(Rx, Ry, Rz, Tx, Ty, Tz) · Z<sub>1</sub>(Rx, Ry, Rz, Tx, Ty, Tz),  
Rz):

Z11<sub>z</sub>(Rx, Ry, Rz, Tx, Ty, Tz);

$$\begin{aligned}
& (2 (R_x - T_x)^2 (R_z - T_z)) / ((R_x^2 - 2 R_x T_x + T_x^2 + R_y^2 - 2 R_y T_y + T_y^2 + R_z^2 \\
& - 2 R_z T_z + T_z^2) (R_x^2 - 2 R_x T_x + T_x^2 + R_y^2 - 2 R_y T_y + T_y^2)) - ((R_x - T_x)^2 (R_z - T_z)^2 (2 R_z - \\
& + T_y^2))
\end{aligned}$$

subs(Rx^2 - 2 Rx Tx + Tx^2 + Ry^2 - 2 Ry Ty + Ty^2 + Rz^2 - 2 Rz Tz + Tz^2 = R2, %):

subs(Rx^2 - 2 Rx Tx + Tx^2 + Ry^2 - 2 Ry Ty + Ty^2 = RY2, %);

$$\begin{aligned}
& \frac{2 (R_x - T_x)^2 (R_z - T_z)}{R2 RY2} - \frac{(R_x - T_x)^2 (R_z - T_z)^2 (2 R_z - 2 T_z)}{R2^2 RY2}
\end{aligned} \tag{4.3.7}$$

**z[2]\*z[2]**

Z22<sub>x</sub> := (Rx, Ry, Rz, Tx, Ty, Tz) → diff (Z<sub>2</sub>(Rx, Ry, Rz, Tx, Ty, Tz) · Z<sub>2</sub>(Rx, Ry, Rz, Tx, Ty, Tz),

$$\begin{aligned}
& Rx) : \\
& Z22_x(Rx, Ry, Rz, Tx, Ty, Tz); \\
& - \left( (Ry - Ty)^2 (Rz - Tz)^2 (2 Rx - 2 Tx) \right) / \left( (Rx^2 - 2 Rx Tx + Tx^2 + Ry^2 - 2 Ry Ty + Ty^2 \right. \\
& \quad \left. + Rz^2 - 2 Rz Tz + Tz^2)^2 (Rx^2 - 2 Rx Tx + Tx^2 + Ry^2 - 2 Ry Ty + Ty^2) \right) \\
& - \left( (Ry - Ty)^2 (Rz - Tz)^2 (2 Rx - 2 Tx) \right) / \left( (Rx^2 - 2 Rx Tx + Tx^2 + Ry^2 - 2 Ry Ty + Ty^2 + Rz^2 - 2 \right. \\
& \quad \left. + Tz^2)^2 \right) \\
& subs(Rx^2 - 2 Rx Tx + Tx^2 + Ry^2 - 2 Ry Ty + Ty^2 + Rz^2 - 2 Rz Tz + Tz^2 = R2, \% ) : \\
& subs(Rx^2 - 2 Rx Tx + Tx^2 + Ry^2 - 2 Ry Ty + Ty^2 = RY2, \% ); \\
& - \frac{(Ry - Ty)^2 (Rz - Tz)^2 (2 Rx - 2 Tx)}{R2^2 RY2} - \frac{(Ry - Ty)^2 (Rz - Tz)^2 (2 Rx - 2 Tx)}{R2 RY2^2} \quad (4.3.9)
\end{aligned}$$

$$\begin{aligned}
& Z22_y := (Rx, Ry, Rz, Tx, Ty, Tz) \rightarrow diff(Z_2(Rx, Ry, Rz, Tx, Ty, Tz) \cdot Z_2(Rx, Ry, Rz, Tx, Ty, Tz), \\
& \quad Ry) : \\
& Z22_y(Rx, Ry, Rz, Tx, Ty, Tz); \\
& (2 (Ry - Ty) (Rz - Tz)^2) / \left( (Rx^2 - 2 Rx Tx + Tx^2 + Ry^2 - 2 Ry Ty + Ty^2 + Rz^2 \right. \\
& \quad \left. - 2 Rz Tz + Tz^2) (Rx^2 - 2 Rx Tx + Tx^2 + Ry^2 - 2 Ry Ty + Ty^2) \right) - \left( (Ry - Ty)^2 (Rz - Tz)^2 (2 Ry - \right. \\
& \quad \left. + Ty^2) \right) - \left( (Ry - Ty)^2 (Rz - Tz)^2 (2 Ry - 2 Ty) \right) / \left( (Rx^2 - 2 Rx Tx + Tx^2 \right. \\
& \quad \left. + Ry^2 - 2 Ry Ty + Ty^2 + Rz^2 - 2 Rz Tz + Tz^2) (Rx^2 - 2 Rx Tx + Tx^2 + Ry^2 \right. \\
& \quad \left. - 2 Ry Ty + Ty^2)^2 \right) \\
& \quad \quad \quad (4.3.11)
\end{aligned}$$

$$\begin{aligned}
& subs(Rx^2 - 2 Rx Tx + Tx^2 + Ry^2 - 2 Ry Ty + Ty^2 + Rz^2 - 2 Rz Tz + Tz^2 = R2, \% ) : \\
& subs(Rx^2 - 2 Rx Tx + Tx^2 + Ry^2 - 2 Ry Ty + Ty^2 = RY2, \% ); \\
& \frac{2 (Ry - Ty) (Rz - Tz)^2}{R2 RY2} - \frac{(Ry - Ty)^2 (Rz - Tz)^2 (2 Ry - 2 Ty)}{R2^2 RY2} \\
& - \frac{(Ry - Ty)^2 (Rz - Tz)^2 (2 Ry - 2 Ty)}{R2 RY2^2} \quad (4.3.12)
\end{aligned}$$

$$\begin{aligned}
& Z22_z := (Rx, Ry, Rz, Tx, Ty, Tz) \rightarrow diff(Z_2(Rx, Ry, Rz, Tx, Ty, Tz) \cdot Z_2(Rx, Ry, Rz, Tx, Ty, Tz), \\
& \quad Rz) : \\
& Z22_z(Rx, Ry, Rz, Tx, Ty, Tz); \\
& (2 (Ry - Ty)^2 (Rz - Tz)) / \left( (Rx^2 - 2 Rx Tx + Tx^2 + Ry^2 - 2 Ry Ty + Ty^2 + Rz^2 \right. \\
& \quad \left. - 2 Rz Tz + Tz^2) (Rx^2 - 2 Rx Tx + Tx^2 + Ry^2 - 2 Ry Ty + Ty^2) \right) - \left( (Ry - Ty)^2 (Rz - Tz)^2 (2 Rz - \right. \\
& \quad \left. + Ty^2) \right) \\
& subs(Rx^2 - 2 Rx Tx + Tx^2 + Ry^2 - 2 Ry Ty + Ty^2 + Rz^2 - 2 Rz Tz + Tz^2 = R2, \% ) : \\
& subs(Rx^2 - 2 Rx Tx + Tx^2 + Ry^2 - 2 Ry Ty + Ty^2 = RY2, \% ); \\
& \frac{2 (Ry - Ty)^2 (Rz - Tz)}{R2 RY2} - \frac{(Ry - Ty)^2 (Rz - Tz)^2 (2 Rz - 2 Tz)}{R2^2 RY2} \quad (4.3.14)
\end{aligned}$$

$$\mathbf{z[3]*z[3] = 1-x[3]*x[3]}$$

$$Z33_x := (Rx, Ry, Rz, Tx, Ty, Tz) \rightarrow \text{diff} \left( Z_3(Rx, Ry, Rz, Tx, Ty, Tz) \cdot Z_3(Rx, Ry, Rz, Tx, Ty, Tz), \right. \\ \left. Rx \right) :$$

$$Z33_x(Rx, Ry, Rz, Tx, Ty, Tz);$$

$$\begin{aligned} & \left( 2 \left( (Rx - Tx)^2 + (Ry - Ty)^2 \right) (2 Rx - 2 Tx) \right) / \left( (Rx^2 - 2 Rx Tx + Tx^2 + Ry^2 \right. \\ & \quad \left. - 2 Ry Ty + Ty^2 + Rz^2 - 2 Rz Tz + Tz^2) (Rx^2 - 2 Rx Tx + Tx^2 + Ry^2 - 2 Ry Ty \right. \\ & \quad \left. + Ty^2) \right) - \left( \left( (Rx - Tx)^2 + (Ry - Ty)^2 \right)^2 (2 Rx - 2 Tx) \right) / \left( (Rx^2 - 2 Rx Tx + Tx^2 + Ry^2 - 2 Ry Ty + \right. \\ & \quad \left. - 2 Ry Ty + Ty^2) \right) - \left( \left( (Rx - Tx)^2 + (Ry - Ty)^2 \right)^2 (2 Rx - 2 Tx) \right) / \left( (Rx^2 \right. \\ & \quad \left. - 2 Rx Tx + Tx^2 + Ry^2 - 2 Ry Ty + Ty^2 + Rz^2 - 2 Rz Tz + Tz^2) (Rx^2 - 2 Rx Tx \right. \\ & \quad \left. + Tx^2 + Ry^2 - 2 Ry Ty + Ty^2)^2 \right) \end{aligned}$$

$$\text{subs}(Rx^2 - 2 Rx Tx + Tx^2 + Ry^2 - 2 Ry Ty + Ty^2 + Rz^2 - 2 Rz Tz + Tz^2 = R2, \%):$$

$$\text{subs}(Rx^2 - 2 Rx Tx + Tx^2 + Ry^2 - 2 Ry Ty + Ty^2 = RY2, \%):$$

$$\text{subs}((Rx - Tx)^2 + (Ry - Ty)^2 = RY2, \%);$$

$$\frac{2 Rx - 2 Tx}{R2} - \frac{RY2 (2 Rx - 2 Tx)}{R2^2}$$

**(4.3.16)**

$$Z33_y := (Rx, Ry, Rz, Tx, Ty, Tz) \rightarrow \text{diff} \left( Z_3(Rx, Ry, Rz, Tx, Ty, Tz) \cdot Z_3(Rx, Ry, Rz, Tx, Ty, Tz), \right. \\ \left. Ry \right) :$$

$$Z33_y(Rx, Ry, Rz, Tx, Ty, Tz);$$

$$\begin{aligned} & \left( 2 \left( (Rx - Tx)^2 + (Ry - Ty)^2 \right) (2 Ry - 2 Ty) \right) / \left( (Rx^2 - 2 Rx Tx + Tx^2 + Ry^2 \right. \\ & \quad \left. - 2 Ry Ty + Ty^2 + Rz^2 - 2 Rz Tz + Tz^2) (Rx^2 - 2 Rx Tx + Tx^2 + Ry^2 - 2 Ry Ty \right. \\ & \quad \left. + Ty^2) \right) - \left( \left( (Rx - Tx)^2 + (Ry - Ty)^2 \right)^2 (2 Ry - 2 Ty) \right) / \left( (Rx^2 - 2 Rx Tx + Tx^2 + Ry^2 - 2 Ry Ty + \right. \\ & \quad \left. - 2 Ry Ty + Ty^2) \right) - \left( \left( (Rx - Tx)^2 + (Ry - Ty)^2 \right)^2 (2 Ry - 2 Ty) \right) / \left( (Rx^2 \right. \\ & \quad \left. - 2 Rx Tx + Tx^2 + Ry^2 - 2 Ry Ty + Ty^2 + Rz^2 - 2 Rz Tz + Tz^2) (Rx^2 - 2 Rx Tx \right. \\ & \quad \left. + Tx^2 + Ry^2 - 2 Ry Ty + Ty^2)^2 \right) \end{aligned}$$

$$\#eval(\%, \{Rx = -16.692327595, Ry = 2.053546334, Rz = 4.935321773, Tx = -16.319510615, Ty \\ = 3.200959013, Tz = 8.115683388, D2 = 0.512573800\});$$

$$\text{subs}(Rx^2 - 2 Rx Tx + Tx^2 + Ry^2 - 2 Ry Ty + Ty^2 + Rz^2 - 2 Rz Tz + Tz^2 = R2, \%):$$

$$\text{subs}(Rx^2 - 2 Rx Tx + Tx^2 + Ry^2 - 2 Ry Ty + Ty^2 = RY2, \%):$$

$$\text{subs}((Rx - Tx)^2 + (Ry - Ty)^2 = RY2, \%);$$

$$\frac{2 Ry - 2 Ty}{R2} - \frac{RY2 (2 Ry - 2 Ty)}{R2^2}$$

**(4.3.18)**

$$Z33_z := (Rx, Ry, Rz, Tx, Ty, Tz) \rightarrow \text{diff} \left( Z_3(Rx, Ry, Rz, Tx, Ty, Tz) \cdot Z_3(Rx, Ry, Rz, Tx, Ty, Tz), \right. \\ \left. Rz \right) :$$

$$Z33_z(Rx, Ry, Rz, Tx, Ty, Tz);$$

$$\begin{aligned} & - \left( \left( (Rx - Tx)^2 + (Ry - Ty)^2 \right)^2 (2 Rz - 2 Tz) \right) / \left( (Rx^2 - 2 Rx Tx + Tx^2 + Ry^2 - 2 Ry Ty \right. \\ & \quad \left. + Ty^2 + Rz^2 - 2 Rz Tz + Tz^2)^2 (Rx^2 - 2 Rx Tx + Tx^2 + Ry^2 - 2 Ry Ty + Ty^2) \right) \end{aligned} \quad \textbf{(4.3.19)}$$

$$\begin{aligned}
& \text{subs}(Rx^2 - 2 Rx Tx + Tx^2 + Ry^2 - 2 Ry Ty + Ty^2 + Rz^2 - 2 Rz Tz + Tz^2 = R2, \%) : \\
& \text{subs}(Rx^2 - 2 Rx Tx + Tx^2 + Ry^2 - 2 Ry Ty + Ty^2 = RY2, \%) : \\
& \text{subs}((Rx - Tx)^2 + (Ry - Ty)^2 = RY2, \%); \\
& \quad - \frac{RY2 (2 Rz - 2 Tz)}{R2^2} \tag{4.3.20}
\end{aligned}$$

**z[2]\*z[1]**

$$Z2I_x := (Rx, Ry, Rz, Tx, Ty, Tz) \rightarrow \text{diff}(Z_2(Rx, Ry, Rz, Tx, Ty, Tz) \cdot Z_1(Rx, Ry, Rz, Tx, Ty, Tz), Rx) :$$

$$Z2I_x(Rx, Ry, Rz, Tx, Ty, Tz);$$

$$\begin{aligned}
& - \left( (Ry - Ty) (Rz - Tz)^2 (Rx - Tx) (2 Rx - 2 Tx) \right) / \left( (Rx^2 - 2 Rx Tx + Tx^2 + Ry^2 - 2 Ry Ty + Ty^2 + Rz^2 - 2 Rz Tz + Tz^2)^2 (Rx^2 - 2 Rx Tx + Tx^2 + Ry^2 - 2 Ry Ty + Ty^2) \right) \\
& - \left( (Ry - Ty) (Rz - Tz)^2 (Rx - Tx) (2 Rx - 2 Tx) \right) / \left( (Rx^2 - 2 Rx Tx + Tx^2 + Ry^2 - 2 Ry Ty + Ty^2 + Rz^2 - 2 Rz Tz + Tz^2) (Rx^2 - 2 Rx Tx + Tx^2 + Ry^2 - 2 Ry Ty + Ty^2) \right) \\
& + \left( (Ry - Ty) (Rz - Tz)^2 \right) / \left( (Rx^2 - 2 Rx Tx + Tx^2 + Ry^2 - 2 Ry Ty + Ty^2 + Rz^2 - 2 Rz Tz + Tz^2) (Rx^2 - 2 Rx Tx + Tx^2 + Ry^2 - 2 Ry Ty + Ty^2) \right) \tag{4.3.21}
\end{aligned}$$

**(4.3.22)**

$$\begin{aligned}
& \text{subs}(Rx^2 - 2 Rx Tx + Tx^2 + Ry^2 - 2 Ry Ty + Ty^2 + Rz^2 - 2 Rz Tz + Tz^2 = R2, \%) : \\
& \text{subs}(Rx^2 - 2 Rx Tx + Tx^2 + Ry^2 - 2 Ry Ty + Ty^2 = RY2, \%) : \\
& \text{subs}((Rx - Tx)^2 + (Ry - Ty)^2 = RY2, \%);
\end{aligned}$$

$$\begin{aligned}
& - \frac{(Ry - Ty) (Rz - Tz)^2 (Rx - Tx) (2 Rx - 2 Tx)}{R2^2 RY2} \\
& - \frac{(Ry - Ty) (Rz - Tz)^2 (Rx - Tx) (2 Rx - 2 Tx)}{R2 RY2^2} + \frac{(Ry - Ty) (Rz - Tz)^2}{R2 RY2} \tag{4.3.23}
\end{aligned}$$

$$Z2I_y := (Rx, Ry, Rz, Tx, Ty, Tz) \rightarrow \text{diff}(Z_2(Rx, Ry, Rz, Tx, Ty, Tz) \cdot Z_1(Rx, Ry, Rz, Tx, Ty, Tz), Ry) :$$

$$Z2I_y(Rx, Ry, Rz, Tx, Ty, Tz);$$

$$\begin{aligned}
& \left( (Rz - Tz)^2 (Rx - Tx) \right) / \left( (Rx^2 - 2 Rx Tx + Tx^2 + Ry^2 - 2 Ry Ty + Ty^2 + Rz^2 - 2 Rz Tz + Tz^2) (Rx^2 - 2 Rx Tx + Tx^2 + Ry^2 - 2 Ry Ty + Ty^2) \right) \\
& - \left( (Ry - Ty) (Rz - Tz)^2 (Rx - Tx) (2 Ry - 2 Ty) \right) / \left( (Rx^2 - 2 Rx Tx + Tx^2 + Ry^2 - 2 Ry Ty + Ty^2 + Rz^2 - 2 Rz Tz + Tz^2)^2 (Rx^2 - 2 Rx Tx + Tx^2 + Ry^2 - 2 Ry Ty + Ty^2) \right) \\
& - \left( (Ry - Ty) (Rz - Tz)^2 (Rx - Tx) (2 Ry - 2 Ty) \right) / \left( (Rx^2 - 2 Rx Tx + Tx^2 + Ry^2 - 2 Ry Ty + Ty^2 + Rz^2 - 2 Rz Tz + Tz^2) (Rx^2 - 2 Rx Tx + Tx^2 + Ry^2 - 2 Ry Ty + Ty^2) \right) \tag{4.3.24}
\end{aligned}$$

**(4.3.25)**

$$\text{subs}(Rx^2 - 2 Rx Tx + Tx^2 + Ry^2 - 2 Ry Ty + Ty^2 + Rz^2 - 2 Rz Tz + Tz^2 = R2, \%) :$$



$$\begin{aligned}
& \text{subs}(Rx^2 - 2 Rx Tx + Tx^2 + Ry^2 - 2 Ry Ty + Ty^2 = RY2, \% ) : \\
& \text{subs}((Rx - Tx)^2 + (Ry - Ty)^2 = RY2, \% ); \\
& \frac{(Rz - Tz)^2 (Rx - Tx)}{R2 RY2} - \frac{(Ry - Ty) (Rz - Tz)^2 (Rx - Tx) (2 Ry - 2 Ty)}{R2^2 RY2} \\
& - \frac{(Ry - Ty) (Rz - Tz)^2 (Rx - Tx) (2 Ry - 2 Ty)}{R2 RY2^2}
\end{aligned} \tag{4.3.26}$$

$$Z2I_z := (Rx, Ry, Rz, Tx, Ty, Tz) \rightarrow \text{diff}(Z_2(Rx, Ry, Rz, Tx, Ty, Tz) \cdot Z_1(Rx, Ry, Rz, Tx, Ty, Tz), Rz) :$$

$$Z2I_z(Rx, Ry, Rz, Tx, Ty, Tz);$$

$$\begin{aligned}
& (2 (Ry - Ty) (Rz - Tz) (Rx - Tx)) / ((Rx^2 - 2 Rx Tx + Tx^2 + Ry^2 - 2 Ry Ty + Ty^2 \\
& + Rz^2 - 2 Rz Tz + Tz^2) (Rx^2 - 2 Rx Tx + Tx^2 + Ry^2 - 2 Ry Ty + Ty^2)) - ((Ry \\
& - Ty) (Rz - Tz)^2 (Rx - Tx) (2 Rz - 2 Tz)) / ((Rx^2 - 2 Rx Tx + Tx^2 + Ry^2 \\
& - 2 Ry Ty + Ty^2 + Rz^2 - 2 Rz Tz + Tz^2)^2 (Rx^2 - 2 Rx Tx + Tx^2 + Ry^2 - 2 Ry Ty \\
& + Ty^2))
\end{aligned} \tag{4.3.27}$$

$$\tag{4.3.28}$$

$$\text{subs}(Rx^2 - 2 Rx Tx + Tx^2 + Ry^2 - 2 Ry Ty + Ty^2 + Rz^2 - 2 Rz Tz + Tz^2 = R2, \% ) :$$

$$\text{subs}(Rx^2 - 2 Rx Tx + Tx^2 + Ry^2 - 2 Ry Ty + Ty^2 = RY2, \% ) :$$

$$\text{subs}((Rx - Tx)^2 + (Ry - Ty)^2 = RY2, \% );$$

$$\frac{2 (Ry - Ty) (Rz - Tz) (Rx - Tx)}{R2 RY2} - \frac{(Ry - Ty) (Rz - Tz)^2 (Rx - Tx) (2 Rz - 2 Tz)}{R2^2 RY2} \tag{4.3.29}$$

$$\mathbf{z[3]*z[1] = -x[3]*x[1]}$$

$$Z3I_x := (Rx, Ry, Rz, Tx, Ty, Tz) \rightarrow \text{diff}(Z_3(Rx, Ry, Rz, Tx, Ty, Tz) \cdot Z_1(Rx, Ry, Rz, Tx, Ty, Tz), Rx) :$$

$$Z3I_x(Rx, Ry, Rz, Tx, Ty, Tz);$$

$$\begin{aligned}
& -((2 Rx - 2 Tx) (Rx - Tx) (Rz - Tz)) / ((Rx^2 - 2 Rx Tx + Tx^2 + Ry^2 - 2 Ry Ty + Ty^2 \\
& + Rz^2 - 2 Rz Tz + Tz^2) (Rx^2 - 2 Rx Tx + Tx^2 + Ry^2 - 2 Ry Ty + Ty^2)) \\
& + ((Rx - Tx)^2 + (Ry - Ty)^2) (Rx - Tx) (Rz - Tz) (2 Rx - 2 Tx)) / ((Rx^2 - 2 Rx Tx + Tx^2 + Ry^2 \\
& + Ty^2)) + ((Rx - Tx)^2 + (Ry - Ty)^2) (Rx - Tx) (Rz - Tz) (2 Rx \\
& - 2 Tx)) / ((Rx^2 - 2 Rx Tx + Tx^2 + Ry^2 - 2 Ry Ty + Ty^2 + Rz^2 - 2 Rz Tz \\
& + Tz^2) (Rx^2 - 2 Rx Tx + Tx^2 + Ry^2 - 2 Ry Ty + Ty^2)^2) - ((Rx - Tx)^2 + (Ry - Ty)^2) (Rz - Tz) / \\
& - 2 Ry Ty + Ty^2)
\end{aligned}$$

$$\tag{4.3.31}$$

$$\text{subs}(Rx^2 - 2 Rx Tx + Tx^2 + Ry^2 - 2 Ry Ty + Ty^2 + Rz^2 - 2 Rz Tz + Tz^2 = R2, \% ) :$$

$$\text{subs}(Rx^2 - 2 Rx Tx + Tx^2 + Ry^2 - 2 Ry Ty + Ty^2 = RY2, \% ) :$$

$$\text{subs}((Rx - Tx)^2 + (Ry - Ty)^2 = RY2, \% );$$

$$\frac{(Rx - Tx) (Rz - Tz) (2 Rx - 2 Tx)}{R2^2} - \frac{Rz - Tz}{R2} \quad (4.3.32)$$

$$Z3I_y := (Rx, Ry, Rz, Tx, Ty, Tz) \rightarrow \text{diff} (Z_3(Rx, Ry, Rz, Tx, Ty, Tz) \cdot Z_1(Rx, Ry, Rz, Tx, Ty, Tz), \\ Ry) :$$

$$Z3I_y(Rx, Ry, Rz, Tx, Ty, Tz);$$

$$\begin{aligned} & - ((2 Ry - 2 Ty) (Rx - Tx) (Rz - Tz)) / ((Rx^2 - 2 Rx Tx + Tx^2 + Ry^2 - 2 Ry Ty + Ty^2 \\ & + Rz^2 - 2 Rz Tz + Tz^2) (Rx^2 - 2 Rx Tx + Tx^2 + Ry^2 - 2 Ry Ty + Ty^2)) \\ & + (( (Rx - Tx)^2 + (Ry - Ty)^2) (Rx - Tx) (Rz - Tz) (2 Ry - 2 Ty)) / ((Rx^2 - 2 Rx Tx + Tx^2 + Ry^2 \\ & + Ty^2)) + (( (Rx - Tx)^2 + (Ry - Ty)^2) (Rx - Tx) (Rz - Tz) (2 Ry \\ & - 2 Ty)) / ((Rx^2 - 2 Rx Tx + Tx^2 + Ry^2 - 2 Ry Ty + Ty^2 + Rz^2 - 2 Rz Tz \\ & + Tz^2) (Rx^2 - 2 Rx Tx + Tx^2 + Ry^2 - 2 Ry Ty + Ty^2)^2) \end{aligned} \quad (4.3.34)$$

$$\text{subs}(Rx^2 - 2 Rx Tx + Tx^2 + Ry^2 - 2 Ry Ty + Ty^2 + Rz^2 - 2 Rz Tz + Tz^2 = R2, \%):$$

$$\text{subs}(Rx^2 - 2 Rx Tx + Tx^2 + Ry^2 - 2 Ry Ty + Ty^2 = RY2, \%):$$

$$\text{subs}((Rx - Tx)^2 + (Ry - Ty)^2 = RY2, \%);$$

$$\frac{(Rx - Tx) (Rz - Tz) (2 Ry - 2 Ty)}{R2^2} \quad (4.3.35)$$

$$Z3I_z := (Rx, Ry, Rz, Tx, Ty, Tz) \rightarrow \text{diff} (Z_3(Rx, Ry, Rz, Tx, Ty, Tz) \cdot Z_1(Rx, Ry, Rz, Tx, Ty, Tz), \\ Rz) :$$

$$Z3I_z(Rx, Ry, Rz, Tx, Ty, Tz);$$

$$\begin{aligned} & (( (Rx - Tx)^2 + (Ry - Ty)^2) (Rx - Tx) (Rz - Tz) (2 Rz - 2 Tz)) / ((Rx^2 - 2 Rx Tx + Tx^2 + Ry^2 - 2 Ry Ty + Ty^2 + Rz^2 - 2 Rz Tz + Tz^2)^2 \\ & (Rx^2 - 2 Rx Tx + Tx^2 + Ry^2 - 2 Ry Ty + Ty^2)) - (( (Rx - Tx)^2 + (Ry - Ty)^2) (Rx - Tx)) / ((Rx^2 - 2 Rx Tx + Tx^2 + Ry^2 - 2 Ry Ty + Ty^2 + Rz^2 - 2 Rz Tz + Tz^2) \\ & (Rx^2 - 2 Rx Tx + Tx^2 + Ry^2 - 2 Ry Ty + Ty^2)) \end{aligned} \quad (4.3.36)$$

$$\text{subs}(Rx^2 - 2 Rx Tx + Tx^2 + Ry^2 - 2 Ry Ty + Ty^2 + Rz^2 - 2 Rz Tz + Tz^2 = R2, \%):$$

$$\text{subs}(Rx^2 - 2 Rx Tx + Tx^2 + Ry^2 - 2 Ry Ty + Ty^2 = RY2, \%):$$

$$\text{subs}((Rx - Tx)^2 + (Ry - Ty)^2 = RY2, \%);$$

$$\frac{(Rx - Tx) (Rz - Tz) (2 Rz - 2 Tz)}{R2^2} - \frac{Rx - Tx}{R2} \quad (4.3.38)$$

$$\mathbf{z[3]*z[2] = -x[3]*x[2]}$$

$$Z32_x := (Rx, Ry, Rz, Tx, Ty, Tz) \rightarrow \text{diff} (Z_3(Rx, Ry, Rz, Tx, Ty, Tz) \cdot Z_2(Rx, Ry, Rz, Tx, Ty, Tz), \\ Rx) :$$

$$Z32_x(Rx, Ry, Rz, Tx, Ty, Tz);$$

$$- ((2 Rx - 2 Tx) (Ry - Ty) (Rz - Tz)) / ((Rx^2 - 2 Rx Tx + Tx^2 + Ry^2 - 2 Ry Ty + Ty^2 + Rz^2 - 2 Rz Tz + Tz^2) (Rx^2 - 2 Rx Tx + Tx^2 + Ry^2 - 2 Ry Ty + Ty^2))$$

$$\begin{aligned}
& + \left( \left( (Rx - Tx)^2 + (Ry - Ty)^2 \right) (Ry - Ty) (Rz - Tz) (2 Rx - 2 Tx) \right) / \left( (Rx^2 - 2 Rx Tx + Tx^2 + Ry^2 \right. \\
& + Ty^2) \left. \right) + \left( \left( (Rx - Tx)^2 + (Ry - Ty)^2 \right) (Ry - Ty) (Rz - Tz) (2 Rx \right. \\
& - 2 Tx) \left. \right) / \left( (Rx^2 - 2 Rx Tx + Tx^2 + Ry^2 - 2 Ry Ty + Ty^2 + Rz^2 - 2 Rz Tz \right. \\
& + Tz^2) \left. (Rx^2 - 2 Rx Tx + Tx^2 + Ry^2 - 2 Ry Ty + Ty^2)^2 \right)
\end{aligned}$$

(4.3.40)

$$\begin{aligned}
& subs(Rx^2 - 2 Rx Tx + Tx^2 + Ry^2 - 2 Ry Ty + Ty^2 + Rz^2 - 2 Rz Tz + Tz^2 = R2, \%) : \\
& subs(Rx^2 - 2 Rx Tx + Tx^2 + Ry^2 - 2 Ry Ty + Ty^2 = RY2, \%) : \\
& subs((Rx - Tx)^2 + (Ry - Ty)^2 = RY2, \%);
\end{aligned}$$

$$\frac{(Ry - Ty) (Rz - Tz) (2 Rx - 2 Tx)}{R2^2}$$

(4.3.41)

$$\begin{aligned}
Z32_y &:= (Rx, Ry, Rz, Tx, Ty, Tz) \rightarrow diff(Z_3(Rx, Ry, Rz, Tx, Ty, Tz) \cdot Z_2(Rx, Ry, Rz, Tx, Ty, Tz), \\
& Ry) :
\end{aligned}$$

$$Z32_y(Rx, Ry, Rz, Tx, Ty, Tz);$$

$$\begin{aligned}
& - \left( (2 Ry - 2 Ty) (Ry - Ty) (Rz - Tz) \right) / \left( (Rx^2 - 2 Rx Tx + Tx^2 + Ry^2 - 2 Ry Ty + Ty^2 \right. \\
& + Rz^2 - 2 Rz Tz + Tz^2) \left. (Rx^2 - 2 Rx Tx + Tx^2 + Ry^2 - 2 Ry Ty + Ty^2) \right) \\
& + \left( \left( (Rx - Tx)^2 + (Ry - Ty)^2 \right) (Ry - Ty) (Rz - Tz) (2 Ry - 2 Ty) \right) / \left( (Rx^2 - 2 Rx Tx + Tx^2 + Ry^2 \right. \\
& + Ty^2) \left. \right) + \left( \left( (Rx - Tx)^2 + (Ry - Ty)^2 \right) (Ry - Ty) (Rz - Tz) (2 Ry \right. \\
& - 2 Ty) \left. \right) / \left( (Rx^2 - 2 Rx Tx + Tx^2 + Ry^2 - 2 Ry Ty + Ty^2 + Rz^2 - 2 Rz Tz \right. \\
& + Tz^2) \left. (Rx^2 - 2 Rx Tx + Tx^2 + Ry^2 - 2 Ry Ty + Ty^2)^2 \right) - \left( \left( (Rx - Tx)^2 + (Ry - Ty)^2 \right) (Rz - Tz) \right) / \\
& - 2 Ry Ty + Ty^2)
\end{aligned}$$

(4.3.43)

$$\begin{aligned}
& subs(Rx^2 - 2 Rx Tx + Tx^2 + Ry^2 - 2 Ry Ty + Ty^2 + Rz^2 - 2 Rz Tz + Tz^2 = R2, \%) : \\
& subs(Rx^2 - 2 Rx Tx + Tx^2 + Ry^2 - 2 Ry Ty + Ty^2 = RY2, \%) : \\
& subs((Rx - Tx)^2 + (Ry - Ty)^2 = RY2, \%);
\end{aligned}$$

$$\frac{(Ry - Ty) (Rz - Tz) (2 Ry - 2 Ty)}{R2^2} - \frac{Rz - Tz}{R2}$$

(4.3.44)

$$\begin{aligned}
Z32_z &:= (Rx, Ry, Rz, Tx, Ty, Tz) \rightarrow diff(Z_3(Rx, Ry, Rz, Tx, Ty, Tz) \cdot Z_2(Rx, Ry, Rz, Tx, Ty, Tz), \\
& Rz) :
\end{aligned}$$

$$Z32_z(Rx, Ry, Rz, Tx, Ty, Tz);$$

$$\begin{aligned}
& \left( \left( (Rx - Tx)^2 + (Ry - Ty)^2 \right) (Ry - Ty) (Rz - Tz) (2 Rz - 2 Tz) \right) / \left( (Rx^2 - 2 Rx Tx \right. \\
& + Tx^2 + Ry^2 - 2 Ry Ty + Ty^2 + Rz^2 - 2 Rz Tz + Tz^2) \left. (Rx^2 - 2 Rx Tx + Tx^2 + Ry^2 \right. \\
& - 2 Ry Ty + Ty^2) \left. \right) - \left( \left( (Rx - Tx)^2 + (Ry - Ty)^2 \right) (Ry - Ty) \right) / \left( (Rx^2 \right. \\
& - 2 Rx Tx + Tx^2 + Ry^2 - 2 Ry Ty + Ty^2 + Rz^2 - 2 Rz Tz + Tz^2) \left. (Rx^2 - 2 Rx Tx \right. \\
& + Tx^2 + Ry^2 - 2 Ry Ty + Ty^2) \left. \right)
\end{aligned}$$

(4.3.46)

$$\begin{aligned}
&subs(Rx^2 - 2 Rx Tx + Tx^2 + Ry^2 - 2 Ry Ty + Ty^2 + Rz^2 - 2 Rz Tz + Tz^2 = R2, \%) : \\
&subs(Rx^2 - 2 Rx Tx + Tx^2 + Ry^2 - 2 Ry Ty + Ty^2 = RY2, \%) : \\
&subs((Rx - Tx)^2 + (Ry - Ty)^2 = RY2, \%);
\end{aligned}$$

$$\frac{(Ry - Ty) (Rz - Tz) (2 Rz - 2 Tz)}{R2^2} - \frac{Ry - Ty}{R2}$$

**(4.3.47)**
